# Supplementary material
Source: Springer Nature journal article supplement (https://www.springermedizin.de/resource/supplementary/12937_2009_272_MOESM1_ESM.pdf/25654756)

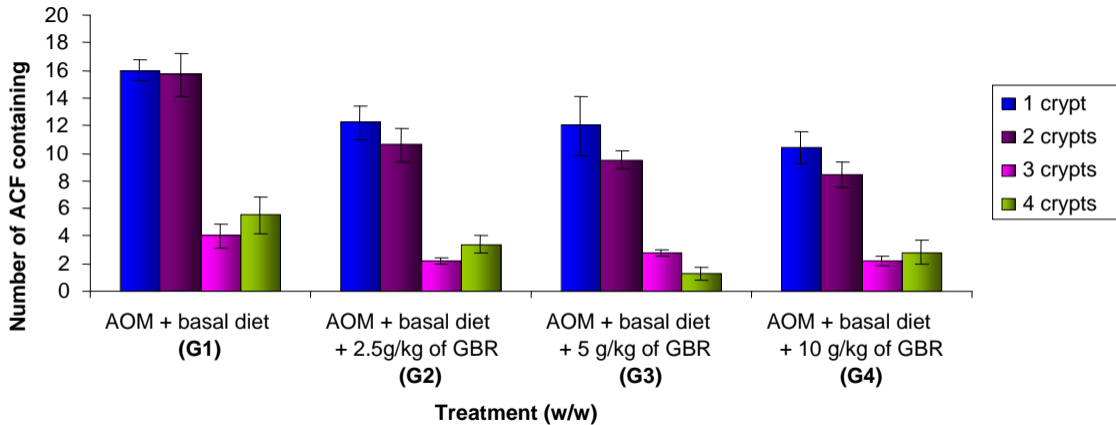

Supplement: MOESM1 [file 25654756]
